# Supplementary material for: Evaluation of Racial Disparities in Quality of Care for Patients With Gastrointestinal Tract Cancer Treated With Surgery
Source: PubMed Central journal article supplement (PMC8980937; doi:10.1001/jamanetworkopen.2022.5664), 2022-04-04
Supplement: jamanetwopen-e225664-s001.pdf [file jamanetwopen-e225664-s001.pdf]

## Supplementary Online Content

Bakkila BF, Kerekes D, Nunez-Smith M, et al. Evaluation of racial disparities in quality of care for patients with gastrointestinal tract cancer treated with surgery. *JAMA Netw Open*. 2022;5(4):e225664. doi:10.1001/jamanetworkopen.2022.5664

**eTable 1.** Demographic and Clinical Characteristics of Patients

**eTable 2.** Survival Analysis by Outcome Metric, Race, and Organ Site

**eFigure 1.** Odds Ratios of Negative Surgical Margins With Covariates (Model 2)

**eFigure 2.** Odds Ratios of Adequate Lymphadenectomy With Covariates (Model 2)

This supplementary material has been provided by the authors to give readers additional information about their work.

**eTable 1: Demographic and Clinical Characteristics of Patients**

Characteristics of gastrointestinal cancer patients in our study population, stratified by white or Black race. *P*-values of Chi-squared tests reported.

| Characteristic                       | All Gastrointestinal Cancer Patients (%) | White Gastrointestinal Cancer Patients (%) | Black Gastrointestinal Cancer Patients (%) | <i>P</i> -value |
|--------------------------------------|------------------------------------------|--------------------------------------------|--------------------------------------------|-----------------|
| <b>Demographic</b>                   | <b>N = 565,124</b>                       | <b>N = 472,133</b>                         | <b>N = 61,750</b>                          |                 |
| <i>Sex</i>                           |                                          |                                            |                                            | <0.001          |
| Female                               | 256,097 (45.3)                           | 211,180 (44.7)                             | 31,229 (50.6)                              |                 |
| Male                                 | 309,027 (54.7)                           | 260,953 (55.3)                             | 30,521 (49.4)                              |                 |
| <i>Age at diagnosis</i>              |                                          |                                            |                                            | <0.001          |
| 40-49                                | 51,303 (9.1)                             | 40,170 (8.5)                               | 7,262 (11.8)                               |                 |
| 50-59                                | 125,342 (22.2)                           | 100,153 (21.2)                             | 17,183 (27.8)                              |                 |
| 60-69                                | 161,269 (28.5)                           | 133,593 (28.3)                             | 18,584 (30.1)                              |                 |
| 70-79                                | 140,237 (24.8)                           | 120,491 (25.5)                             | 12,794 (20.7)                              |                 |
| 80-89                                | 76,951 (13.6)                            | 68,593 (14.5)                              | 5,360 (8.7)                                |                 |
| 90+                                  | 10,022 (1.8)                             | 9,133 (1.9)                                | 567 (0.9)                                  |                 |
| <i>Race</i>                          |                                          |                                            |                                            | <0.001          |
| American Indian, Aleutian, or Eskimo | 1,909 (0.3)                              | 0 (0)                                      | 0 (0)                                      |                 |
| Asian                                | 19,431 (3.4)                             | 0 (0)                                      | 0 (0)                                      |                 |
| Black                                | 61,750 (10.9)                            | 0 (0)                                      | 61,750 (100.0)                             |                 |
| Pacific Islander                     | 921 (0.2)                                | 0 (0)                                      | 0 (0)                                      |                 |

| <b>Characteristic</b>                  | <b>All Gastrointestinal Cancer Patients (%)</b> | <b>White Gastrointestinal Cancer Patients (%)</b> | <b>Black Gastrointestinal Cancer Patients (%)</b> | <b>P-value</b> |
|----------------------------------------|-------------------------------------------------|---------------------------------------------------|---------------------------------------------------|----------------|
| White                                  | 472,133 (83.5)                                  | 472,133 (100.0)                                   | 0 (0)                                             |                |
| Other <sup>1</sup>                     | 4,544 (0.8)                                     | 0 (0)                                             | 0 (0)                                             |                |
| Unknown                                | 4,436 (0.8)                                     | 0 (0)                                             | 0 (0)                                             |                |
| <i>Ethnicity</i>                       |                                                 |                                                   |                                                   | <0.001         |
| Not Hispanic                           | 510,580 (90.3)                                  | 425,932 (90.2)                                    | 59,041 (95.6)                                     |                |
| Hispanic                               | 30,815 (5.4)                                    | 27,617 (5.8)                                      | 661 (1.1)                                         |                |
| Unknown                                | 23,729 (4.2)                                    | 18,584 (3.9)                                      | 2,048 (3.3)                                       |                |
| <i>Primary payor at diagnosis</i>      |                                                 |                                                   |                                                   | <0.001         |
| Not Insured                            | 16,218 (2.9)                                    | 11,556 (2.4)                                      | 3,431 (5.6)                                       |                |
| Private Insurance                      | 217,628 (38.5)                                  | 181,719 (38.5)                                    | 22,500 (36.4)                                     |                |
| Medicaid                               | 31,494 (5.6)                                    | 20,988 (4.4)                                      | 6,873 (11.1)                                      |                |
| Medicare                               | 286,468 (50.7)                                  | 247,446 (52.4)                                    | 27,088 (43.9)                                     |                |
| Other Government                       | 6,213 (1.1)                                     | 4,834 (1.0)                                       | 834 (1.4)                                         |                |
| Unknown                                | 7,103 (1.3)                                     | 5,590 (1.2)                                       | 1,024 (1.7)                                       |                |
| <i>Facility Type</i>                   |                                                 |                                                   |                                                   | <0.001         |
| Community Cancer Program               | 53,516 (9.5)                                    | 46,211 (9.8)                                      | 4,505 (7.3)                                       |                |
| Comprehensive Community Cancer Program | 224,802 (39.8)                                  | 194,672 (41.2)                                    | 20,598 (33.4)                                     |                |

| <b>Characteristic</b>             | <b>Gastrointestinal Cancer Patients (%)</b> | <b>White Gastrointestinal Cancer Patients (%)</b> | <b>Black Gastrointestinal Cancer Patients (%)</b> | <b>P-value</b> |
|-----------------------------------|---------------------------------------------|---------------------------------------------------|---------------------------------------------------|----------------|
| Academic/Research Program         | 212,303 (37.6)                              | 168,785 (35.7)                                    | 28,071 (45.5)                                     |                |
| Integrated Network Cancer Program | 74,503 (13.2)                               | 62,465 (13.2)                                     | 8,576 (13.9)                                      |                |
| <b>Clinical</b>                   | <b>N = 565,124</b>                          |                                                   |                                                   |                |
| <i>Charlson-Deyo Score</i>        |                                             |                                                   |                                                   | <0.001         |
| 0                                 | 391,377 (69.3)                              | 327,705 (69.4)                                    | 41,018 (66.4)                                     |                |
| 1                                 | 121,882 (21.6)                              | 101,193 (21.4)                                    | 14,320 (23.2)                                     |                |
| 2                                 | 33,648 (6.0)                                | 28,328 (6.0)                                      | 3,969 (6.4)                                       |                |
| >=3                               | 18,217 (3.2)                                | 14,907 (3.2)                                      | 2,443 (4.0)                                       |                |
| <i>Primary Site</i>               |                                             |                                                   |                                                   | <0.001         |
| Anus                              | 9,057 (1.6)                                 | 7,824 (1.7)                                       | 1,001 (1.6)                                       |                |
| Colon                             | 253,668 (44.9)                              | 211,254 (44.7)                                    | 31,150 (50.4)                                     |                |
| Esophagus                         | 25,385 (4.8)                                | 23,660 (5.0)                                      | 962 (1.6)                                         |                |
| Gallbladder                       | 6,847 (1.2)                                 | 5,355 (1.1)                                       | 999 (1.6)                                         |                |
| Liver                             | 19,229 (3.4)                                | 14,245 (3.0)                                      | 2,403 (3.9)                                       |                |
| Other Biliary                     | 9,559 (1.7)                                 | 8,050 (1.7)                                       | 742 (1.2)                                         |                |
| Pancreas                          | 48,582 (8.6)                                | 41,497 (8.8)                                      | 4,796 (7.8)                                       |                |

|                                 |                                                 |                                                   |                                                   |                |
|---------------------------------|-------------------------------------------------|---------------------------------------------------|---------------------------------------------------|----------------|
| Peritoneum                      | 2,633 (0.5)                                     | 2,303 (0.5)                                       | 196 (0.3)                                         |                |
| <b>Characteristic</b>           | <b>All Gastrointestinal Cancer Patients (%)</b> | <b>White Gastrointestinal Cancer Patients (%)</b> | <b>Black Gastrointestinal Cancer Patients (%)</b> | <b>P-value</b> |
| Rectum                          | 102,974 (18.2)                                  | 88,340 (18.7)                                     | 8,712 (14.1)                                      |                |
| Rectosigmoid                    | 29,746 (5.3)                                    | 25,237 (5.3)                                      | 2,561 (4.1)                                       |                |
| Small Intestine                 | 15,080 (2.7)                                    | 12,156 (2.6)                                      | 2,364 (3.8)                                       |                |
| Stomach                         | 42,364 (7.5)                                    | 32,313 (6.8)                                      | 5,864 (9.4)                                       |                |
| <i>TNM Clinical Stage Group</i> |                                                 |                                                   |                                                   | <0.001         |
| 0                               | 19,236 (3.4)                                    | 15,818 (3.4)                                      | 2,548 (4.1)                                       |                |
| I                               | 145,477 (25.7)                                  | 121,883 (25.8)                                    | 15,408 (25.0)                                     |                |
| IA                              | 21,686 (3.8)                                    | 17,571 (3.7)                                      | 2,382 (3.9)                                       |                |
| IB                              | 25,764 (4.6)                                    | 21,421 (4.5)                                      | 2,719 (4.4)                                       |                |
| IC                              | 7 (0.0)                                         | 7 (0.0)                                           | 0 (0.0)                                           |                |
| II                              | 18,063 (3.2)                                    | 14,520 (3.1)                                      | 2,164 (3.5)                                       |                |
| IIA                             | 102,312 (18.1)                                  | 86,912 (18.4)                                     | 10,288 (16.7)                                     |                |
| IIB                             | 31,539 (5.6)                                    | 27,014 (5.7)                                      | 2,964 (4.8)                                       |                |
| IIC                             | 5,133 (0.9)                                     | 4,334 (0.9)                                       | 563 (0.9)                                         |                |
| III                             | 9,643 (1.7)                                     | 8,301 (1.8)                                       | 799 (1.3)                                         |                |
| IIIA                            | 26,949 (4.8)                                    | 22,730 (4.8)                                      | 2,677 (4.3)                                       |                |

|                                   |                                                 |                                                   |                                                   |                |
|-----------------------------------|-------------------------------------------------|---------------------------------------------------|---------------------------------------------------|----------------|
| IIIB                              | 57,819 (10.2)                                   | 48,394 (10.3)                                     | 6,214 (10.1)                                      |                |
| <b>Characteristic</b>             | <b>All Gastrointestinal Cancer Patients (%)</b> | <b>White Gastrointestinal Cancer Patients (%)</b> | <b>Black Gastrointestinal Cancer Patients (%)</b> | <b>P-value</b> |
| IIIC                              | 18,281 (3.2)                                    | 15,397 (3.3)                                      | 1,848 (3.0)                                       |                |
| IV                                | 38,165 (6.8)                                    | 31,256 (6.6)                                      | 4,965 (8.0)                                       |                |
| IVA                               | 29,605 (5.2)                                    | 24,089 (5.1)                                      | 4,033 (6.5)                                       |                |
| IVB                               | 14,978 (2.7)                                    | 12,086 (2.6)                                      | 2,130 (3.4)                                       |                |
| IVC                               | 467 (0.1)                                       | 400 (0.1)                                         | 48 (0.1)                                          |                |
| <i>Grade/Differentiation</i>      |                                                 |                                                   |                                                   | <0.001         |
| Well differentiated               | 83,526 (14.8)                                   | 68,367 (14.5)                                     | 10,692 (17.3)                                     |                |
| Moderately differentiated         | 340,088 (60.2)                                  | 284,328 (60.2)                                    | 37,316 (60.4)                                     |                |
| Poorly differentiated             | 128,503 (22.7)                                  | 108,250 (22.9)                                    | 12,621 (20.4)                                     |                |
| Undifferentiated                  | 13,007 (2.3)                                    | 11,188 (2.4)                                      | 1,121 (1.8)                                       |                |
| <b>Resection Margins</b>          | <b>N = 565,124</b>                              |                                                   |                                                   |                |
| <i>Negative Resection Margins</i> |                                                 |                                                   |                                                   | <0.001         |
| Yes                               | 500,097 (88.5)                                  | 417,903 (88.5)                                    | 54,321 (88.0)                                     |                |
| No                                | 65,027 (11.5)                                   | 54,230 (11.5)                                     | 7,429 (12.0)                                      |                |
| <b>Lymph Nodes</b>                | <b>N = 492,909</b>                              |                                                   |                                                   |                |
| <i>Adequate Lymphadenectomy</i>   |                                                 |                                                   |                                                   | <0.001         |
| Yes                               | 350,716 (71.2)                                  | 294,744 (71.2)                                    | 37,661 (70.5)                                     |                |

|    |                |                |               |  |
|----|----------------|----------------|---------------|--|
| No | 142,193 (28.8) | 119,227 (28.8) | 15,766 (29.5) |  |
|----|----------------|----------------|---------------|--|

<sup>1</sup>"Other" was provided as an option for patient-reported races in the National Cancer Database.

**eTable 2. Survival Analysis by Outcome Metric, Race, and Organ Site**

Hazard ratios with reference group set as white patients with desired surgical outcome (negative resection margins or adequate lymphadenectomy).

| Organ           | Hazard Ratios (95% CI) |                   |                   |                    |                          |                   |                            |                   |
|-----------------|------------------------|-------------------|-------------------|--------------------|--------------------------|-------------------|----------------------------|-------------------|
|                 | Resection Margins      |                   |                   |                    | Lymphadenectomy          |                   |                            |                   |
|                 | Negative margins       |                   | Positive margins  |                    | Adequate lymphadenectomy |                   | Inadequate lymphadenectomy |                   |
|                 | White                  | Black             | White             | Black              | White                    | Black             | White                      | Black             |
| All organ sites | Ref                    | 1.12 (1.10, 1.14) | 2.54 (2.51, 2.57) | 2.65 (2.57, 2.71)  | Ref                      | 1.13 (1.11, 1.15) | 1.10 (1.09, 1.11)          | 1.20 (1.17, 1.23) |
| Anus            | Ref                    | 1.27 (1.08, 1.50) | 1.23 (1.13, 1.34) | 1.32 (1.10, 1.58)  | Ref                      | 1.09 (0.81, 1.45) | 1.07 (0.93, 1.23)          | 1.22 (0.93, 1.60) |
| Colon           | Ref                    | 1.17 (1.15, 1.20) | 3.16 (3.10, 3.21) | 3.22 (3.07, 2.27)  | Ref                      | 1.14 (1.12, 1.16) | 1.23 (1.21, 1.25)          | 1.47 (1.42, 1.53) |
| Esophagus       | Ref                    | 1.16 (1.05, 1.27) | 1.91 (1.81, 2.02) | 2.09 (1.66, 2.63)  | Ref                      | 1.14 (0.98, 1.33) | 1.15 (1.11, 1.19)          | 1.35 (1.20, 1.51) |
| Gallbladder     | Ref                    | 0.95 (0.86, 1.06) | 2.88 (2.70, 3.08) | 2.64 (2.32, 3.02)  | Ref                      | 1.00 (0.78, 1.29) | 1.34 (1.21, 1.49)          | 1.18 (1.04, 1.34) |
| Liver           | Ref                    | 1.10 (1.03, 1.19) | 2.52 (2.35, 2.71) | 2.72 (2.27, 3.25)  | Ref                      |                   |                            |                   |
| Other Biliary   | Ref                    | 1.02 (0.91, 1.15) | 2.09 (1.94, 2.26) | 2.12 (1.72, 2.60_) | Ref                      |                   |                            |                   |
| Pancreas        | Ref                    | 1.02 (0.97, 1.07) | 1.90 (1.84, 1.95) | 1.92 (1.78, 2.07)  | Ref                      | 1.07 (1.01, 1.13) | 0.89 (0.87, 0.92)          | 0.87 (0.82, 0.92) |
| Peritoneum      | Ref                    | 0.84 (0.60, 1.17) | 1.49 (1.32, 1.67) | 1.52 (1.16, 1.99)  | Ref                      |                   |                            |                   |



| <b>Organ</b>    | <b>Hazard Ratios (95% CI)</b> |                   |                         |                   |                                 |                   |                                   |                   |
|-----------------|-------------------------------|-------------------|-------------------------|-------------------|---------------------------------|-------------------|-----------------------------------|-------------------|
|                 | <b>Resection Margins</b>      |                   |                         |                   | <b>Lymphadenectomy</b>          |                   |                                   |                   |
|                 | <i>Negative margins</i>       |                   | <i>Positive margins</i> |                   | <i>Adequate lymphadenectomy</i> |                   | <i>Inadequate lymphadenectomy</i> |                   |
|                 | White                         | Black             | White                   | Black             | White                           | Black             | White                             | Black             |
| Rectum          | Ref                           | 1.17 (1.12, 1.22) | 2.49 (2.41, 2.58)       | 2.46 (2.23, 2.70) | Ref                             | 1.25 (1.18, 1.32) | 1.06 (1.03, 1.09)                 | 1.31 (1.22, 1.40) |
| Rectosigmoid    | Ref                           | 1.35 (1.26, 1.45) | 3.26 (3.09, 3.44)       | 3.49 (2.99, 4.06) | Ref                             | 1.28 (1.19, 1.39) | 1.09 (1.04, 1.14)                 | 1.61 (1.43, 1.82) |
| Small Intestine | Ref                           | 1.24 (1.13, 1.36) | 1.77 (1.64, 1.91)       | 2.00 (1.71, 2.35) | Ref                             | 1.19 (1.05, 1.34) | 1.11 (1.04, 1.19)                 | 1.44 (1.28, 1.61) |
| Stomach         | Ref                           | 0.95 (0.91, 1.00) | 2.57 (2.47, 2.67)       | 2.50 (2.29, 2.73) | Ref                             | 0.96 (0.90, 1.02) | 0.94 (0.91, 0.98)                 | 0.86 (0.81, 0.91) |

**eFigure 1. Odds Ratios of Negative Surgical Margins With Covariates (Model 2)**  
 Odds ratios of negative surgical margins, adjusted for the covariates of sex, age group, ethnicity, and organ (not shown) (Model 2).

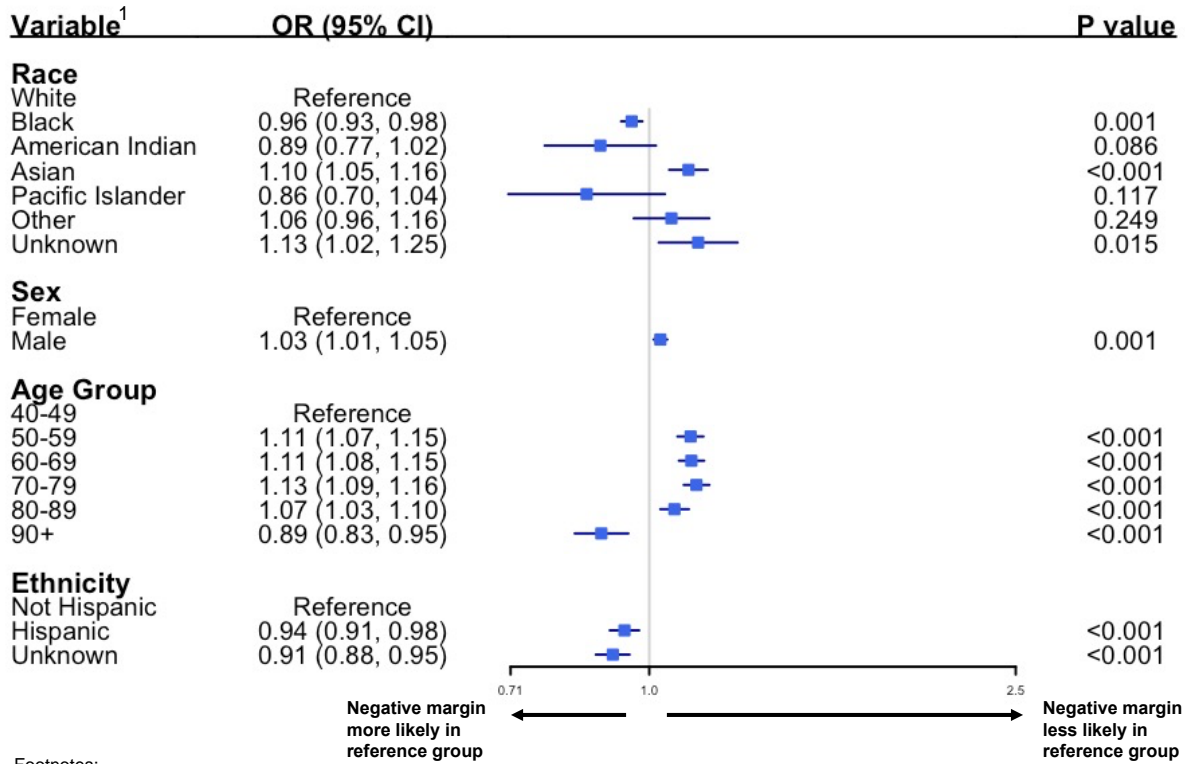

Footnotes:

<sup>1</sup> Model adjusted for sex, age group, ethnicity, and organ site (organ results not shown) (Model 2).

**eFigure 2. Odds Ratios of Adequate Lymphadenectomy With Covariates (Model 2)**  
 Odds ratios of adequate lymphadenectomy, adjusted for the covariates of sex, age group, ethnicity, and organ (not shown) (Model 2).

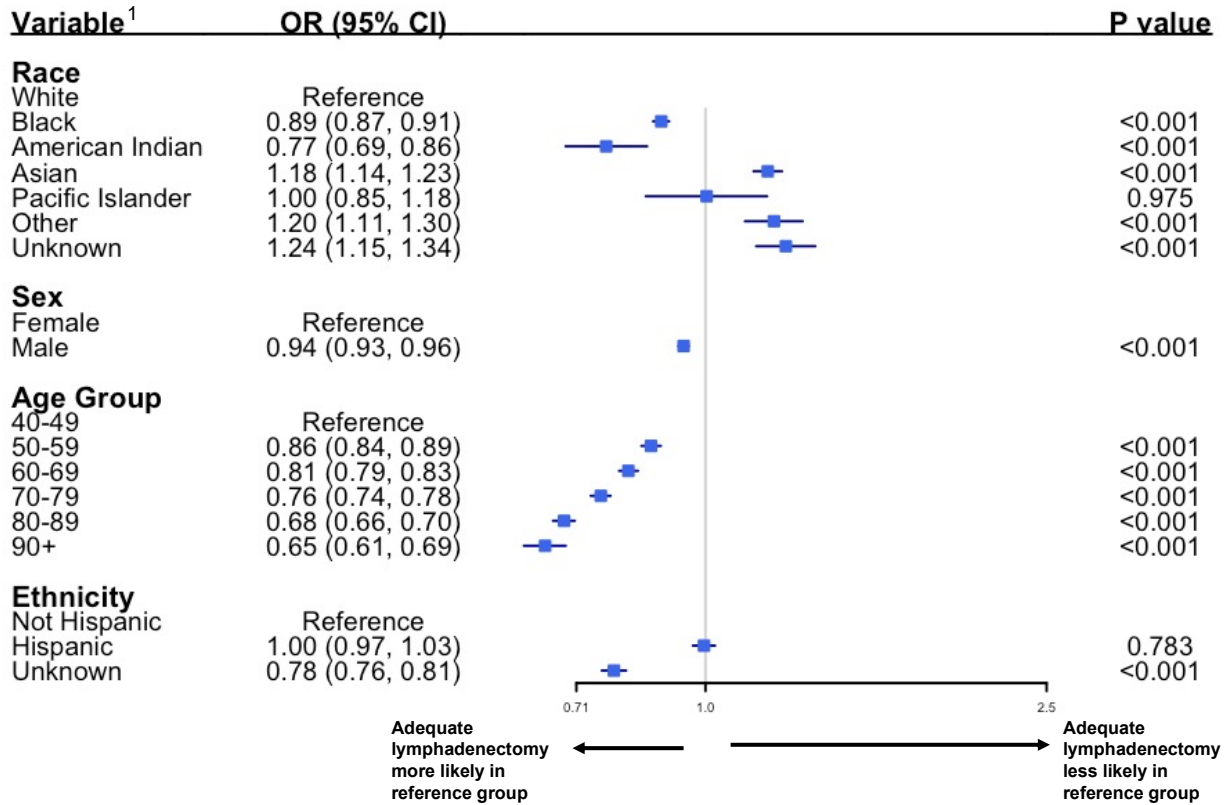

Footnotes:  
<sup>1</sup> Model adjusted for sex, age group, ethnicity, and organ site (Model 2).
